# Supplementary material for: Tear Break-Up Time and Seasonal Variation in Intraocular Pressure in a Japanese Population
Source: MDPI journal article supplement (doi:10.3390/diagnostics10020124), 2020-02-24
Supplement: s1 [file s1]

**Table S1.** Glaucoma medications in each group.

|                              |             | Glaucoma without short<br>BUT | Glaucoma with short<br>BUT |
|------------------------------|-------------|-------------------------------|----------------------------|
| # of medication              | 1           | 28                            | 27                         |
|                              | 2           | 7                             | 5                          |
|                              | 3           | 1                             | 4                          |
|                              | Mean*       | 1.4 ± 0.7                     | 1.2 ± 0.5                  |
| Frequency of<br>instillation | 1           | 27                            | 27                         |
|                              | 2           | 4                             | 1                          |
|                              | 3           | 3                             | 4                          |
|                              | 4           | 1                             | 1                          |
|                              | 5           | 1                             | 3                          |
|                              | Mean**      | 1.4 ± 1.0                     | 1.7 ± 1.3                  |
| Medications<br>PG            | Latanoprost | 21                            | 20                         |
|                              | Tafluprost  | 8                             | 11                         |
|                              | Travoprost  | 3                             | 3                          |
|                              | Bimatoprost | 2                             | 2                          |
| Fixed combination            | PG/timolol  | 2                             | 6                          |
|                              | CAI/timolol | 5                             | 6                          |
| Beta blocker                 | Timolol     | 10                            | 15                         |
|                              | Carteolol   | 0                             | 1                          |
| CAI                          | Dorzolamide | 5                             | 5                          |
|                              | Brinzomide  | 0                             | 3                          |
| Other <sup>A</sup>           |             | 0                             | 4                          |

<sup>A</sup> = Brimonidine tartrate for three and ripasudil hydrochloride hydrate for one. Abbreviations; BUT, tear break-up time; PG, prostaglandin analogue; CAI, carbonic anhydrase inhibitor. \**P* = 0.342, \*\**P* = 0.416 (Kruskal-Wallis).

All of prescribed glaucoma medications contained benzalkonium chloride or other preservative; SofZia in travoprost eyedrop and Polyquad in fixed combination with travoprost and timolol maleate. Active compounds of glaucoma medication prescribed in the present study are as follows: 0.005% latanoprost, 0.0015% tafluprost, 0.004% travoprost, 0.003% bimatoprost, fixed combination of 0.005% latanoprost and 0.5% timolol maleate, fixed combination of 0.0015% tafluprost and 0.5% timolol maleate, fixed combination with 0.004% travoprost and 0.5% timolol maleate, fixed combination with 0.5% timolol maleate and 1% dorzolamide hydrochloride, 1% brinzolamide, 1% dorzoramide hydrochloride, 0.1% brimonidine tartrate, 2% carteolol hydrochloride, 0.4% ripasudil hydrochloride hydrate, and 0.5% timolol maleate.

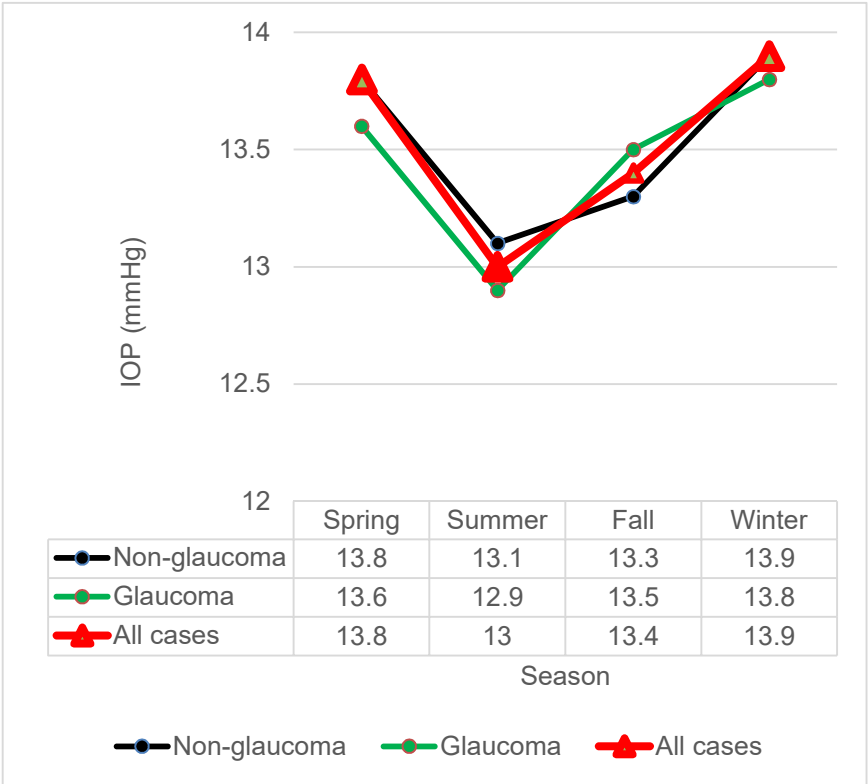

**Figure S1.** Intra-ocular pressure (IOP) of glaucoma and non-glaucoma groups. Seasonal IOP fluctuation before grouping clearly indicates that seasonal IOP may be IOP behavior in short BUT (tear break-up time) cases as shown in Fig S1.
